# Supplementary material for: Partially bio-based aromatic poly(ether sulfone)s bearing pendant furyl groups: synthesis, characterization and thermo-reversible cross-linking with a bismaleimide
Source: Royal Society of Chemistry journal article supplement (doi:10.1039/c8py01477a), 2019-01-01
Supplement: c8py01477a1.pdf [file c8py01477a1.pdf]

## Supporting Information

### Partially Bio-based Aromatic Poly(ether sulfone)s Bearing Pendant Furyl Groups: Synthesis, Characterization and Thermo-reversible Cross-linking with a Bismaleimide

Samadhan S. Nagane<sup>a,b,†</sup>, Sachin S. Kuhire<sup>a,b,†</sup>, Shivshankar R. Mane<sup>a</sup> and Prakash P. Wadgaonkar<sup>\*ab</sup>

<sup>a</sup> Polymers and Advanced Materials Laboratory, Polymer Science and Engineering Division, CSIR-National Chemical Laboratory, Dr. Homi Bhabha Road, Pune-411 008, India.

<sup>b</sup> Academy of Scientific and Innovative Research, Delhi – Mathura Road, New Delhi 110025, India.

**Corresponding author:** Prakash P. Wadgaonkar, (Email: [pp.wadgaonkar@ncl.res.in](mailto:pp.wadgaonkar@ncl.res.in))

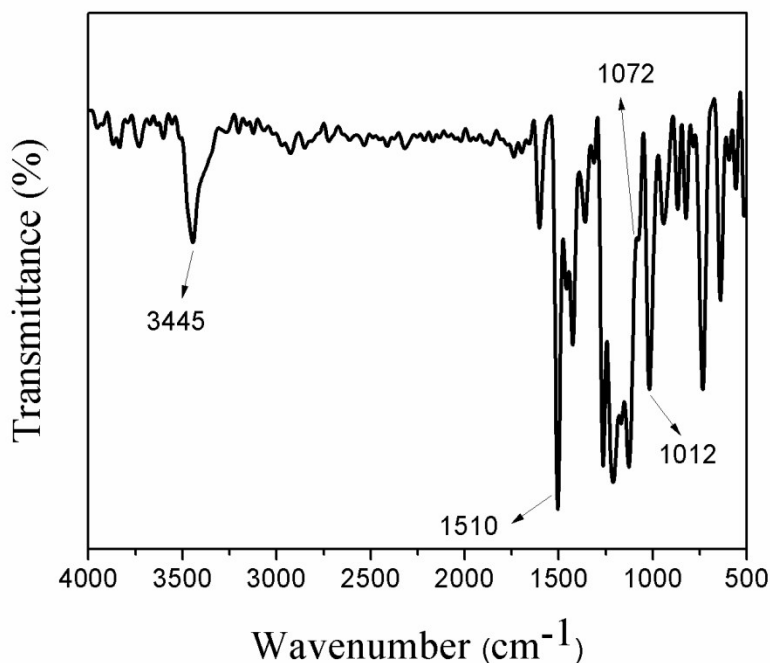

**Fig. S1.** FT-IR spectrum of 4, 4'-(furan-2-ylmethylene)bis(2-methoxyphenol).

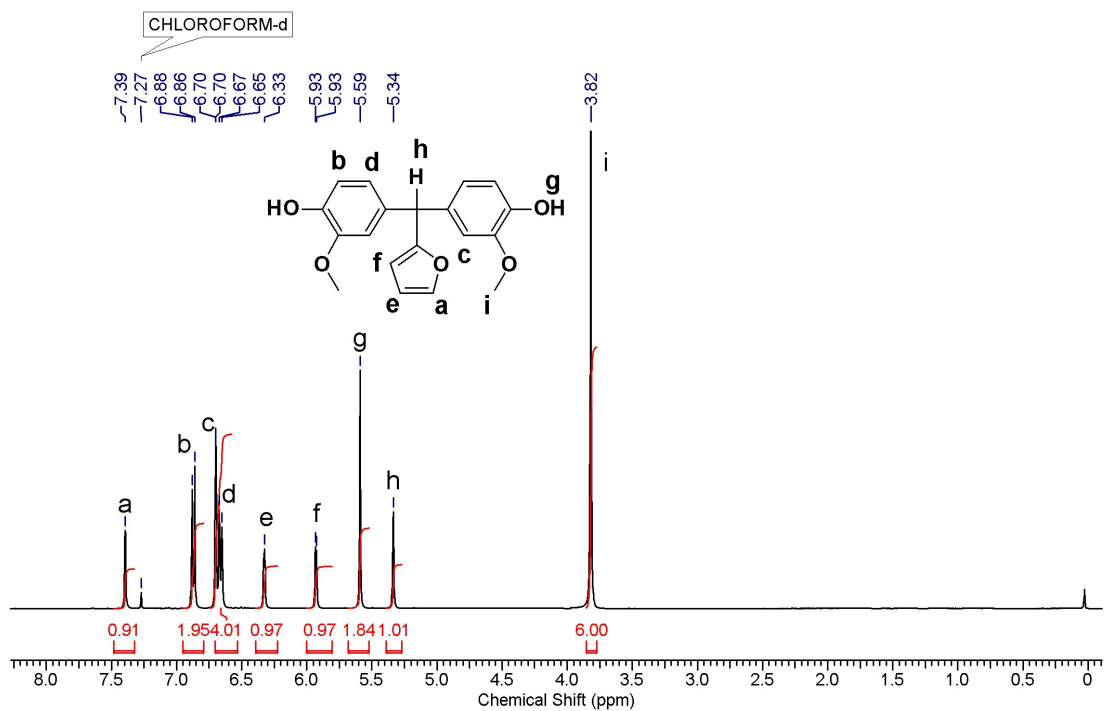

**Fig. S2.** <sup>1</sup>H NMR spectrum (in CDCl<sub>3</sub>) of 4, 4'-(furan-2-ylmethylene)bis(2-methoxyphenol).

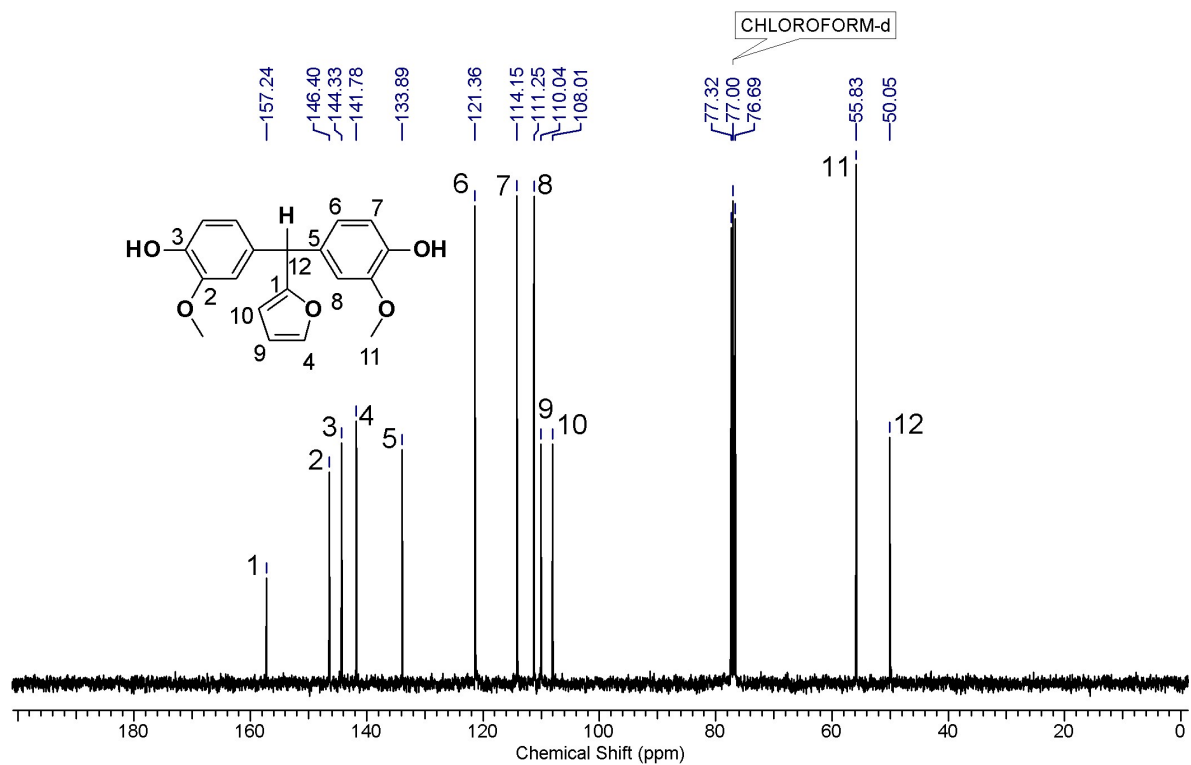

**Fig. S3.** <sup>13</sup>C NMR spectrum (in CDCl<sub>3</sub>) of 4, 4'-(furan-2-ylmethylene)bis(2-methoxyphenol).

BP-F2 #98 RT: 0.43 AV: 1 NL: 4.95E8  
T: FTMS + p ESI Full ms [100.00-1500.00]

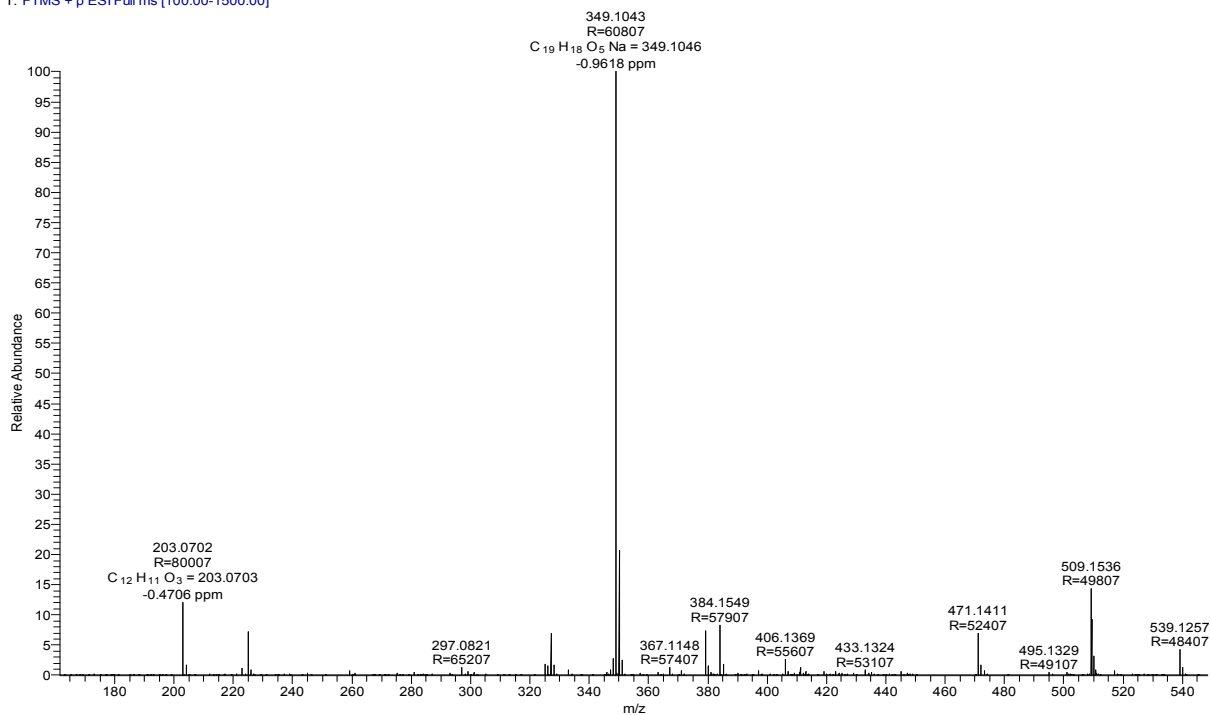

Fig. S4. HRMS of 4, 4'-(furan-2-ylmethylene)bis(2-methoxyphenol).

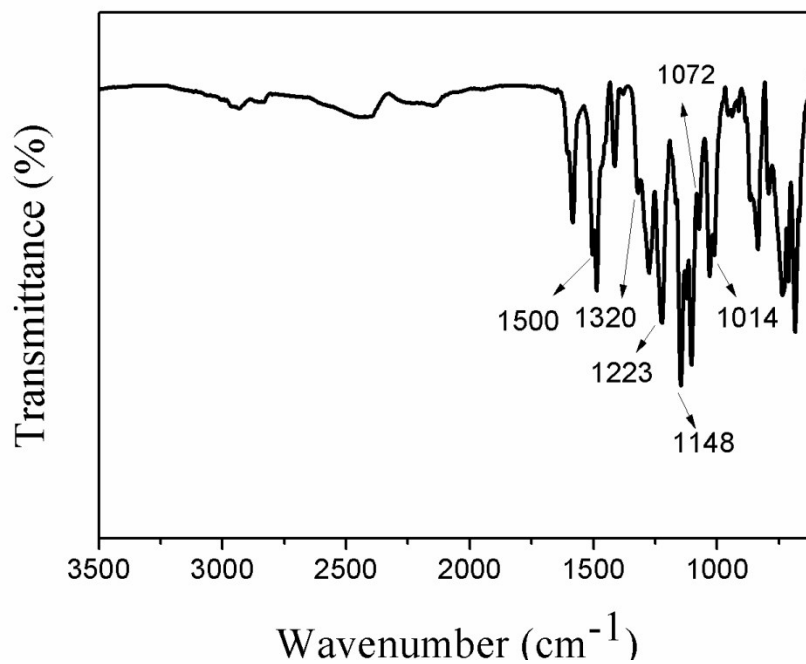

Fig. S5. FT-IR spectrum of poly(ether sulfone) PSU-1.

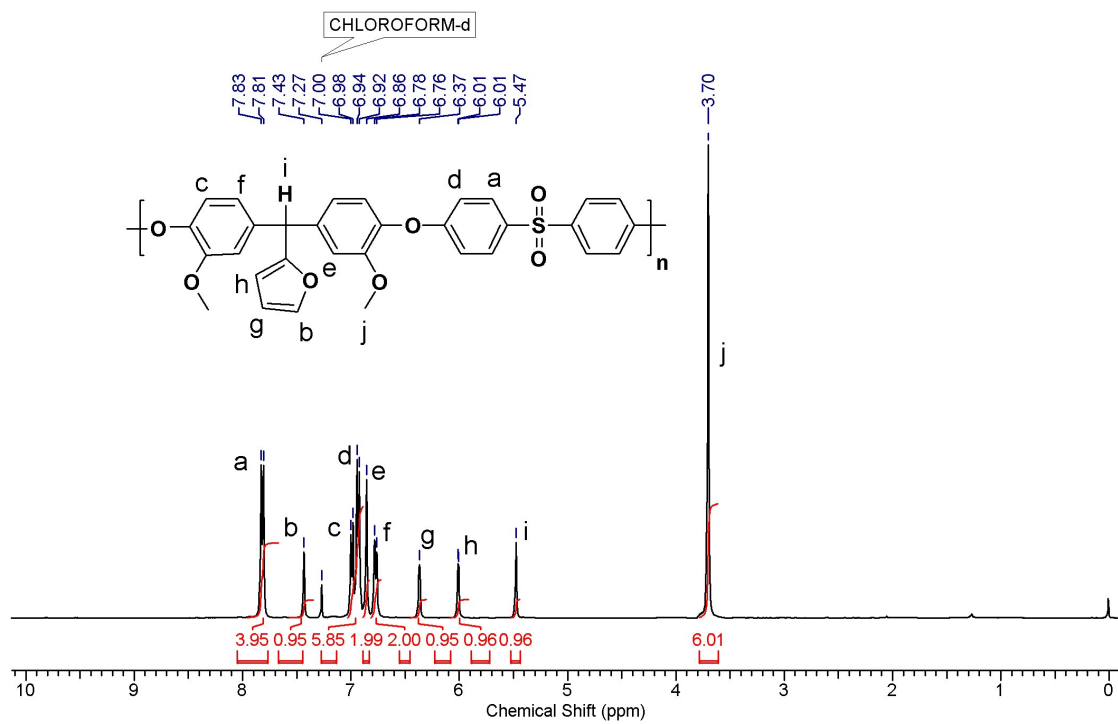

**Fig. S6.**  $^1\text{H}$  NMR spectrum (in  $\text{CDCl}_3$ ) of poly(ether sulfone) PSU-1.

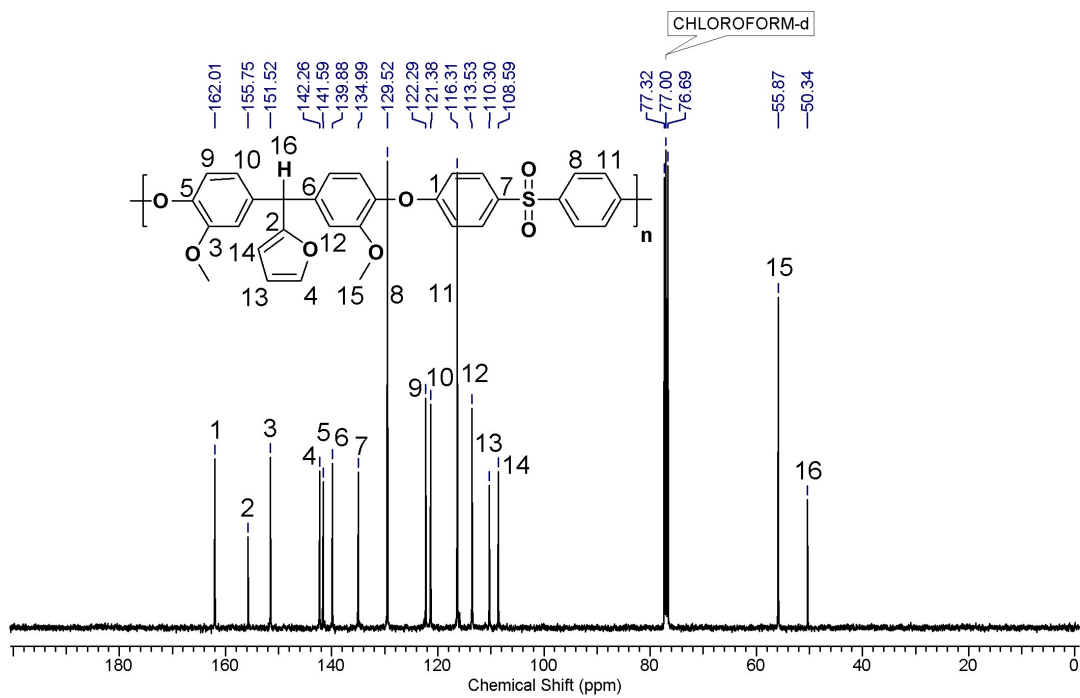

**Fig. S7.**  $^{13}\text{C}$  NMR spectrum (in  $\text{CDCl}_3$ ) of poly(ether sulfone) PSU-1.

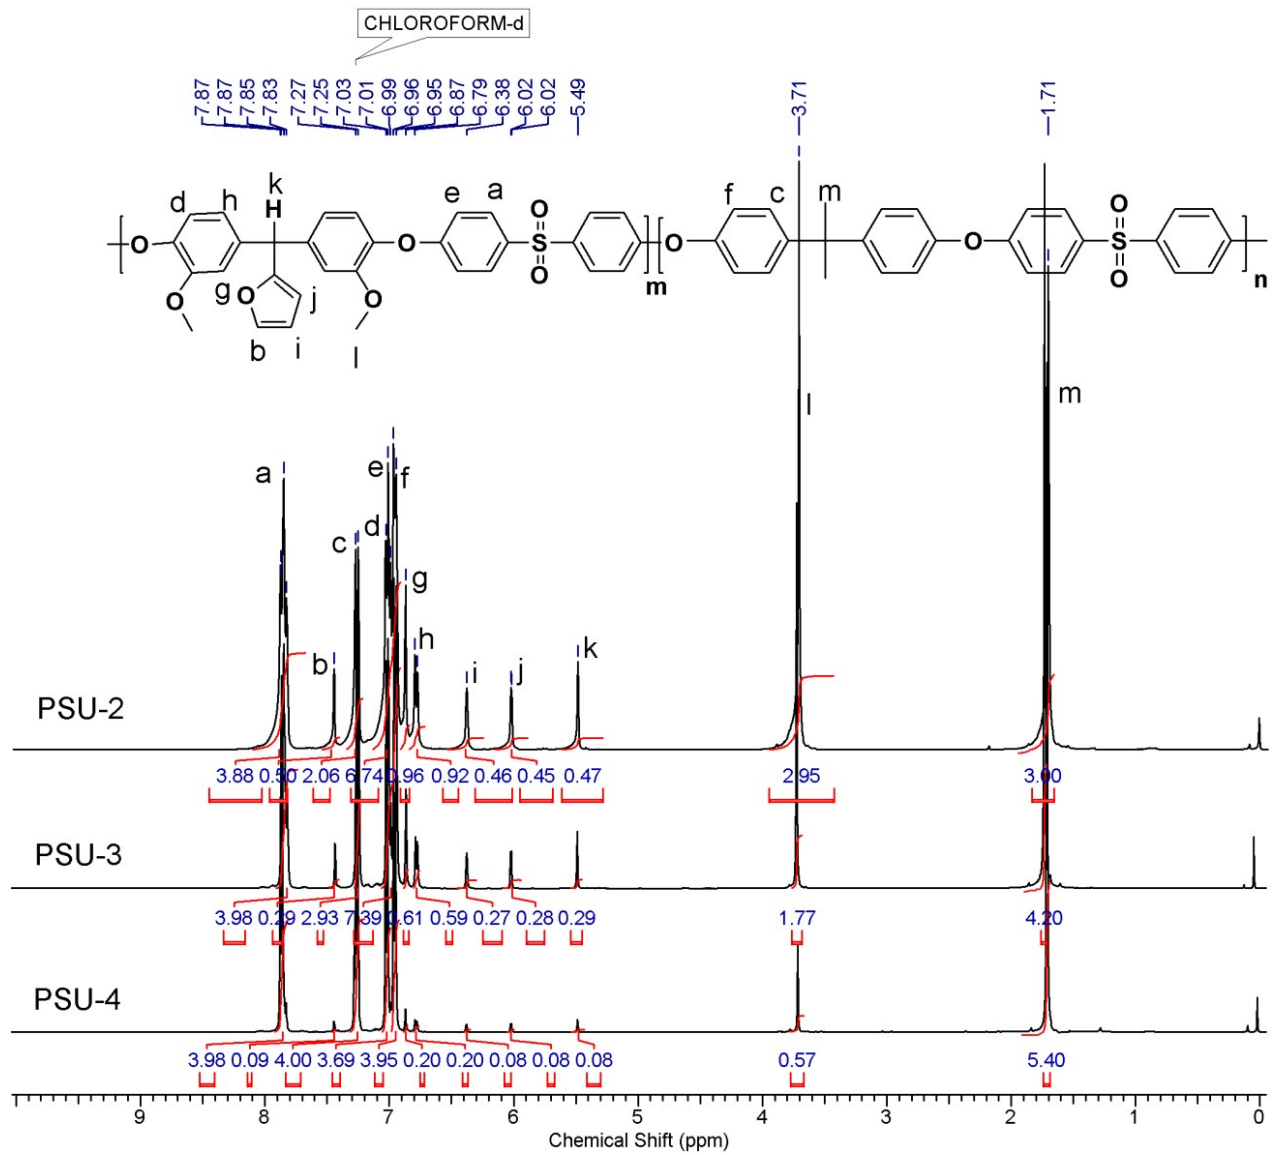

**Fig. S8.**  $^1\text{H}$  NMR spectra (in  $\text{CDCl}_3$ ) of copoly(ether sulfone)s.

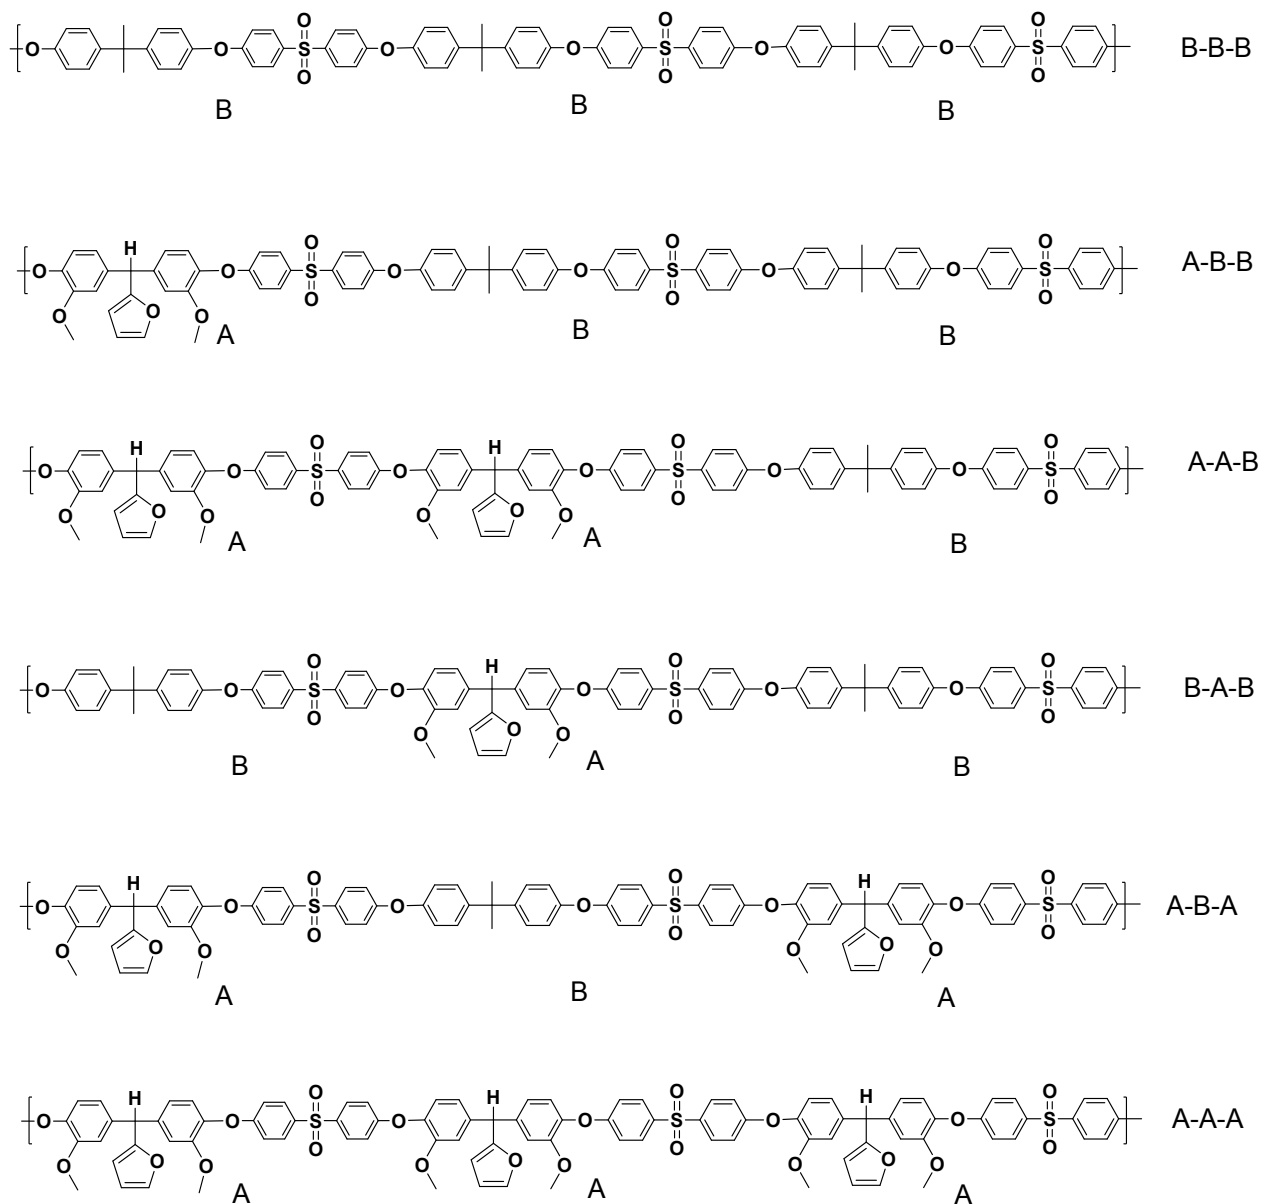

**Fig. S9.** Possible arrangements of BPF and BPA units in copoly(ether sulfone)s.

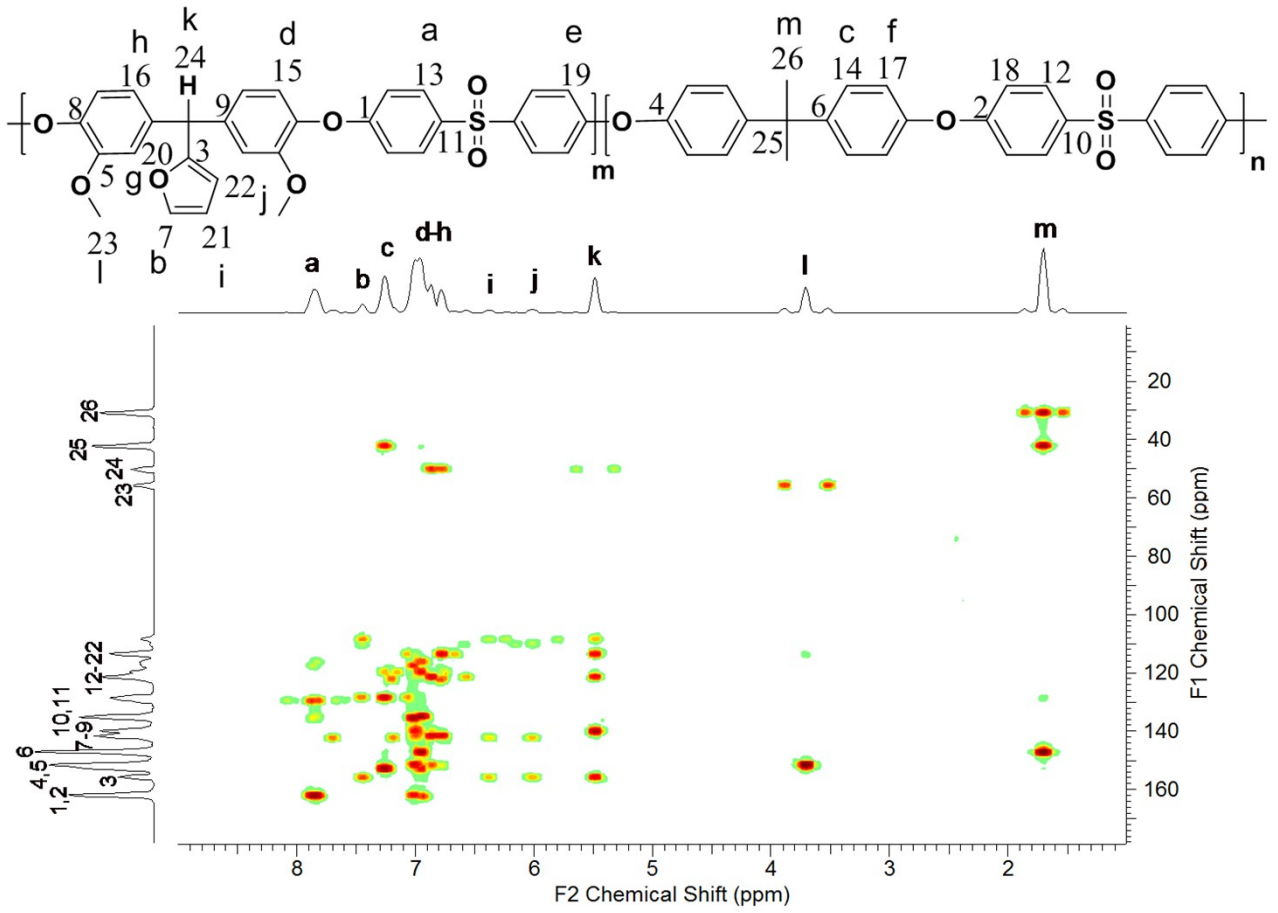

**Fig. S10.** HMBC spectrum (in CDCl<sub>3</sub>) of copoly(ether sulfone) PSU-2.

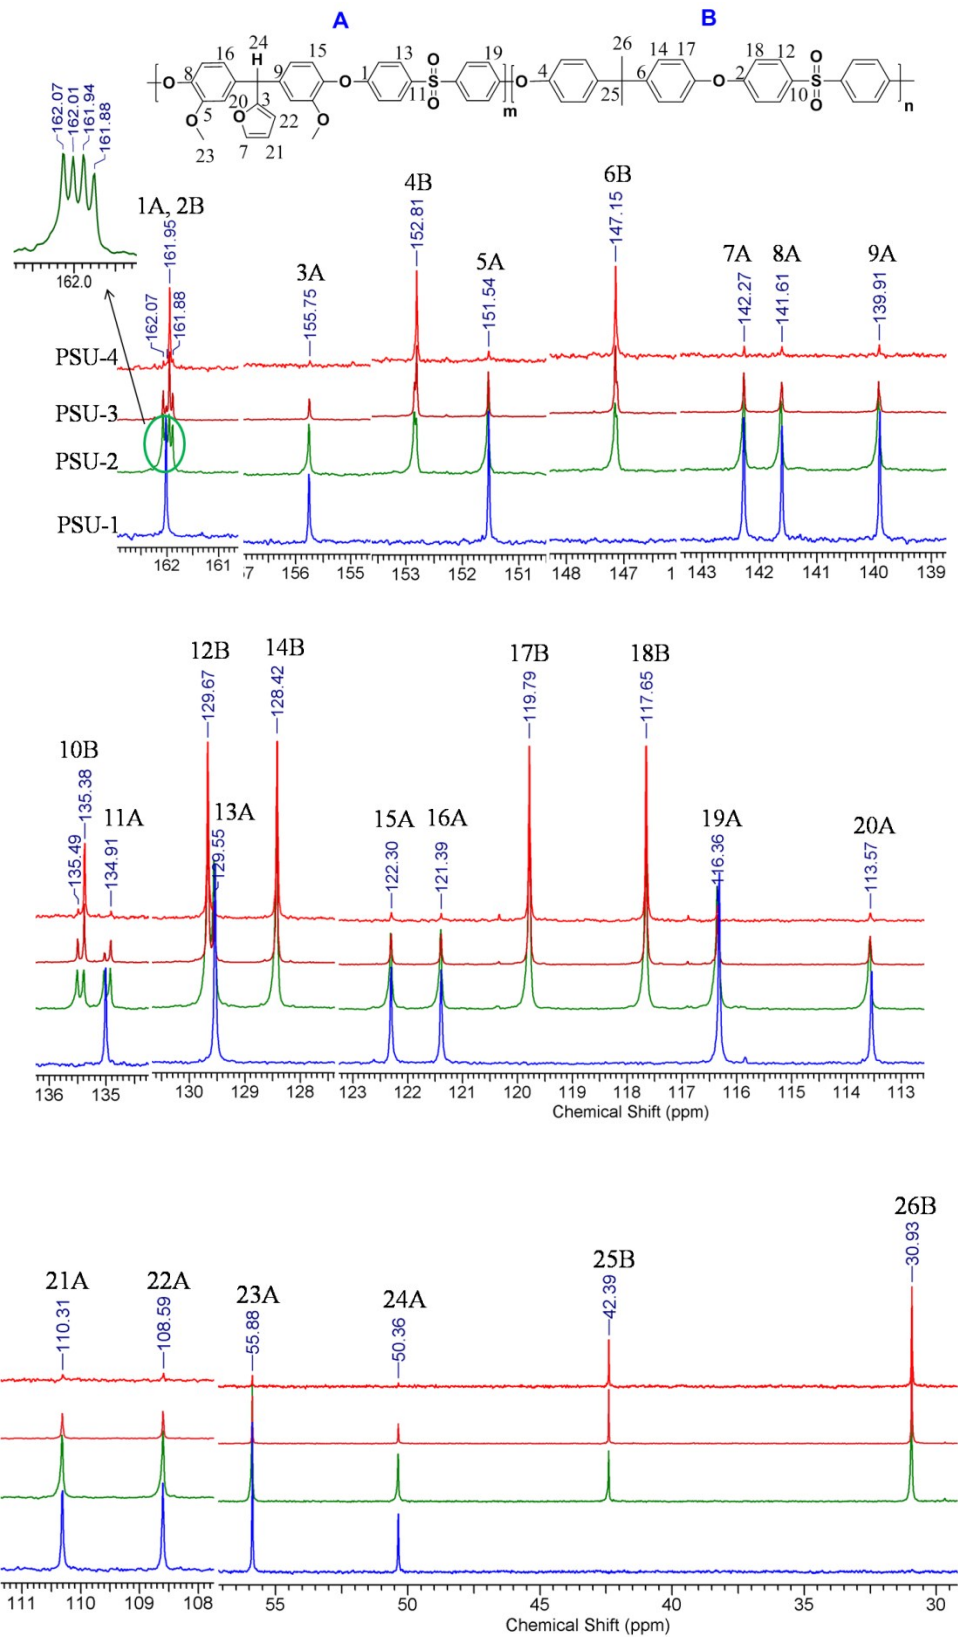

**Fig. S11.**  $^{13}\text{C}$  NMR spectra (in  $\text{CDCl}_3$ ) of (co)poly(ether sulfone)s.



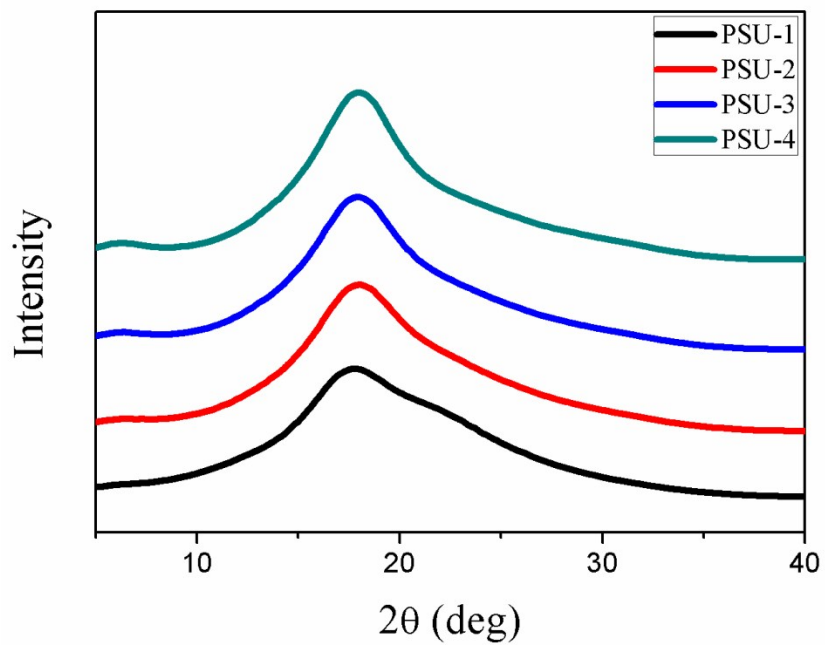

**Fig. S12.** X-Ray diffractograms of (co)poly(ether sulfone)s.

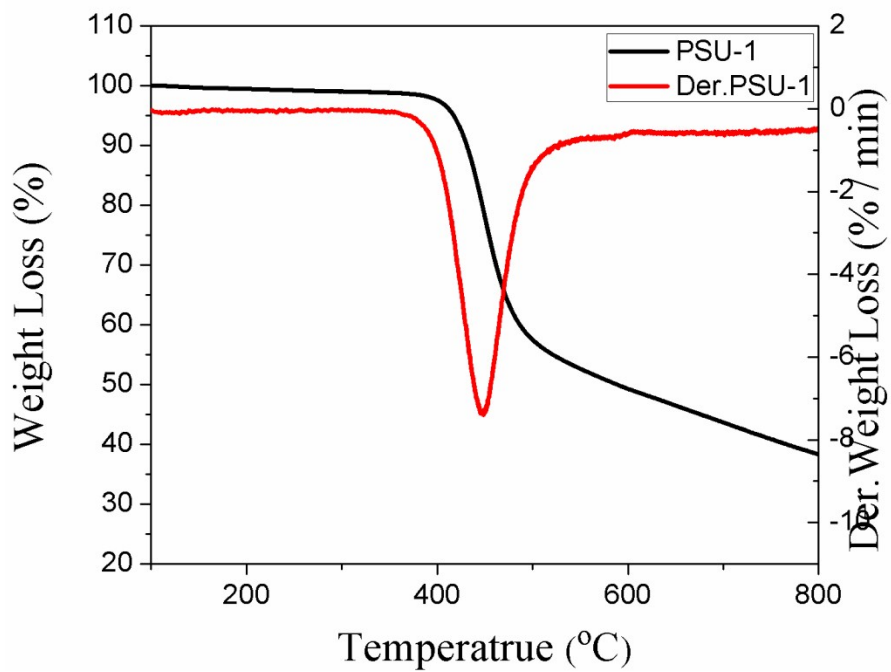

**Fig. S13.** Representative TG and DTG curves of poly(ether sulfone) PSU-1.

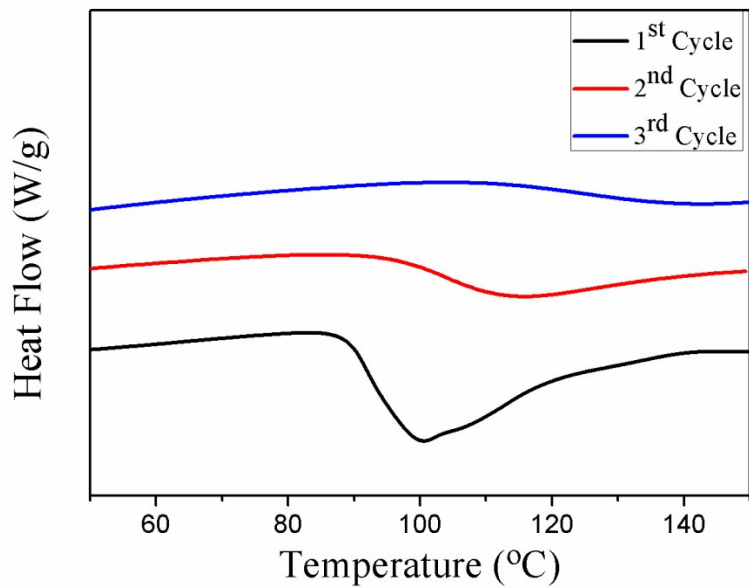

**Fig. S14.** DSC curves (first, second and third heating cycle) of cross-linked copoly(ether sulfone)s PSU-2-BMI.

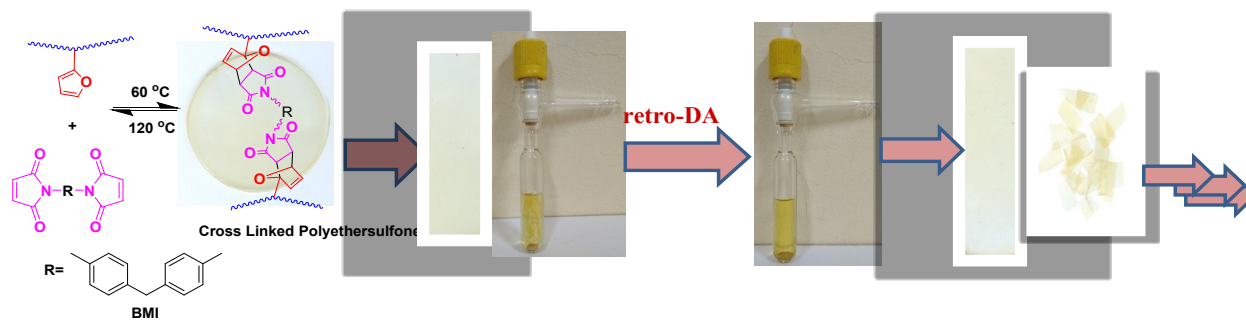

**Fig. S15.** Thermo-reversibility of cross-linked copoly(ether sulfone).
